# Supplementary material
Source: publisher figshare collection journal article supplement (https://aacr.figshare.com/articles/dataset/_/22553487)
Supplement: Supplementary file 1 [file 40020906]

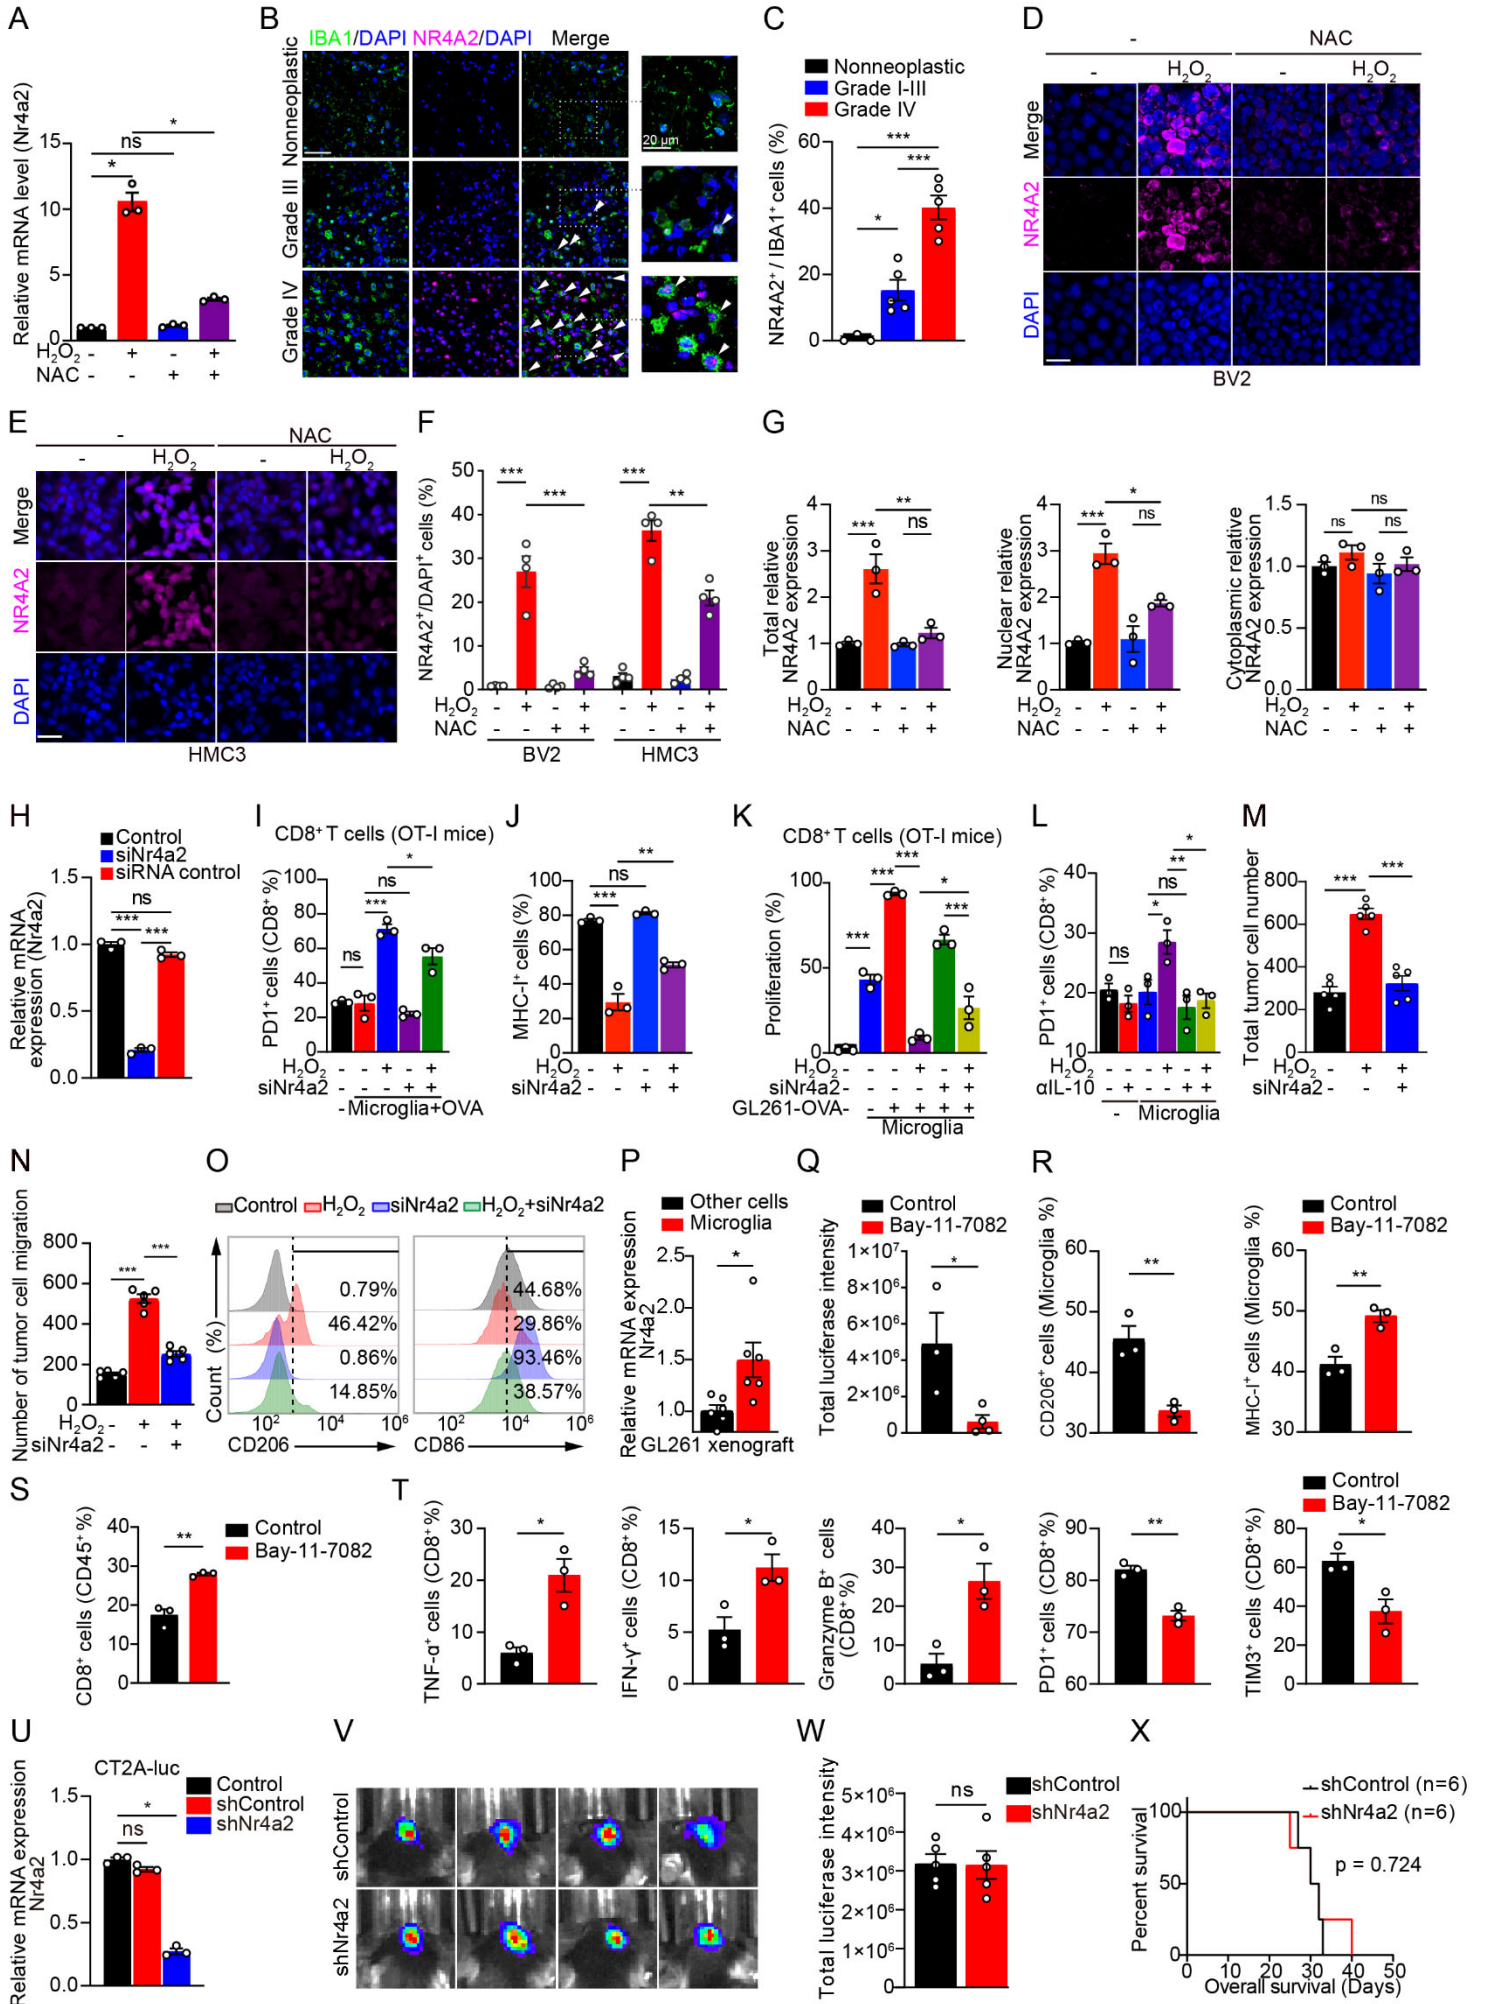

**Supplementary Figure S3. Inhibiting nuclear translocation of NR4A2 hampers immunosuppressive functions and promotes antigen presentation capacities of microglia, related to Figure 4**

(A) Relative expression levels of *Nr4a2* in primary microglia treated by H<sub>2</sub>O<sub>2</sub> (500 μM) in absence or presence of NAC (5 mM) for 12 hours.

(B, C) Immunofluorescence staining for NR4A2 and microglia maker (IBA1) on different grades glioma tissues and nonneoplastic brain tissues. Scale bars, 50 μm (B). Quantification of NR4A2<sup>+</sup> microglia levels in respective group (C).

(D-F) Immunofluorescence staining for NR4A2 on BV2 cells (D) and HMC3 cells (E) cultured on glass coverslips. Scale bars, 20 μm. Quantification of marker-positive cell fractions is shown on the right (F).

(G) Quantification of NR4A2 protein expression in nucleus, cytoplasm and total cell lysates of microglia cells with respective treatment.

(H) Relative expression levels of *Nr4a2* in primary microglia transfected with siNr4a2 or siRNA control.

(I) Primary microglia were transfected by siNr4a2 for 48 hours. Nr4a2-knockdown microglia treated with H<sub>2</sub>O<sub>2</sub> (500 μM) in the absence or presence of NAC (5 mM) for 12 hours. Quantitation of PD1 expression in CD8<sup>+</sup> T cells cocultured with treated Nr4a2-knockdown microglia pulsed with OVA peptide by flow cytometry.

(J) Quantitation of MHC-I expression in treated Nr4a2-knockdown microglia.

(K) Proliferation of CD8<sup>+</sup> T cells in treated Nr4a2-knockdown microglia by flow cytometry. Primary microglia transfected with siNr4a2 for 48 hours was treated with H<sub>2</sub>O<sub>2</sub> (500 μM) in the absence or presence of NAC (5 mM) for 12 hours. Treated microglia was cultured with GL261-OVA cells (1:1) for 12 hours. Microglia purified by microbeads were co-cultured with CD8<sup>+</sup> T cells (1:10) of OT-I mice for 48 hours.

(L) Primary microglia were treated by H<sub>2</sub>O<sub>2</sub> (500 μM) for 12 hours. Treated microglia were co-cultured with CD8<sup>+</sup> T cells (1:10) of for 48 hours in the absence or presence of αLL-10 (1 μg/ml). Flow cytometry was used to evaluate PD1 expression in CD8<sup>+</sup> T cells in each treatment group.

(M, N) NR4A2-knockdown inhibited the pro-tumoral functions of H<sub>2</sub>O<sub>2</sub>-challenged

microglia. Primary microglia transfected with siNr4a2 for 48 hours were treated by H<sub>2</sub>O<sub>2</sub> (500 μM) in absence or presence of NAC (5 mM) for 12 hours. Conditional medium from treated primary microglia was used to incubate with glioma cells (GL261). Cell proliferation (M) and migration (N) of glioma cells were tested by cell counts and Transwell Chamber assays, respectively.

(O) Flow cytometry plot to test CD86 and CD206 levels of Nr4a2-knockdown microglia treated by H<sub>2</sub>O<sub>2</sub> (500 μM) in the absence or presence of NAC (5 mM) for 12 hours.

(P) Relative expression levels of *Nr4a2* in primary microglia and others cells from glioma-bearing mice.

(Q) Quantification of tumor volume of glioma-bearing C57BL/6J mice treated by Bay-11-7082 based on bioluminescence (Figure 4M) (n=3 to 4 for each group).

(R, S) Flow cytometry analysis of CD206 and antigen presentation maker (MHC-I) of microglia (R) and percentage of CD8<sup>+</sup> T cells (S) in glioma tissue from glioma-bearing mice treated with Bay-11-7082 and control mice.

(T) Flow cytometry plot to evaluate cytotoxic functions and immune checkpoint of CD8<sup>+</sup> T cells in glioma tissue from glioma-bearing mice treated with Bay-11-7082 and control mice.

(U) Relative expression levels of *Nr4a2* in CT2A-luc transduced with shNr4a2 or shRNA control.

(V, W) Representative *in vivo* bioluminescence-based images of Nr4a2-knockdown CT2A-luc glioma-bearing C57BL/6J mice (V) and quantification (W) of tumor volume based on bioluminescence (n=5 per group).

(X) Survival curves of C57BL/6J mice implanted with Nr4a2- knockdown CT2A-luc and control (n=6 per group).

Data are shown as mean ± SEM. In (A), (C), (F-N) and (U) P value was calculated using one-way ANOVA analysis. In (P-T) and (W), P value was calculated using the two-tailed Student's *t* test. In (X), survival difference was calculated by log-rank test. \*p < 0.05, \*\*p < 0.01, \*\*\*p < 0.001.
